# Supplementary material for: In situ encapsulation of abundant WP/Ni2P heterointerfaces in N,P co-doped two-dimensional carbon frameworks for boosting hydrogen evolution electrocatalysis
Source: Royal Society of Chemistry journal article supplement (doi:10.1039/d2dt02606f), 2022-01-01
Supplement: d2dt02606f1.pdf [file d2dt02606f1.pdf]

## Electronic Supplementary Information

### **In-situ encapsulating abundant WP/Ni<sub>2</sub>P heterointerfaces in N, P co-doped two-dimensional carbon frameworks for boosting hydrogen evolution electrocatalysis**

Dong Liu <sup>a, b</sup>, Guangyu Xu <sup>a</sup>, Baomin Fan <sup>b \*</sup> and Haitao Wang <sup>a, c \*</sup>

<sup>a</sup> *School of Chemistry and Environmental Engineering, Wuhan Institute of Technology, Wuhan 430205, Hubei, P.R. China;*

<sup>b</sup> *Key laboratory of Processing and Quality Evaluation Technology of Green Plastics of China National Light Industry council, Beijing Technology and Business University, Beijing 100048, P.R. China.*

<sup>c</sup> *Engineering Research Center of Phosphorus Resources Development and Utilization of Ministry of Education, Wuhan Institute of Technology, Wuhan 430205, Hubei, P. R. China.*

#### **\*Corresponding Authors**

*E-mail address:* wanghaitao@wit.edu.cn (H. W), fanbaomin@btbu.edu.cn (B. Fan)

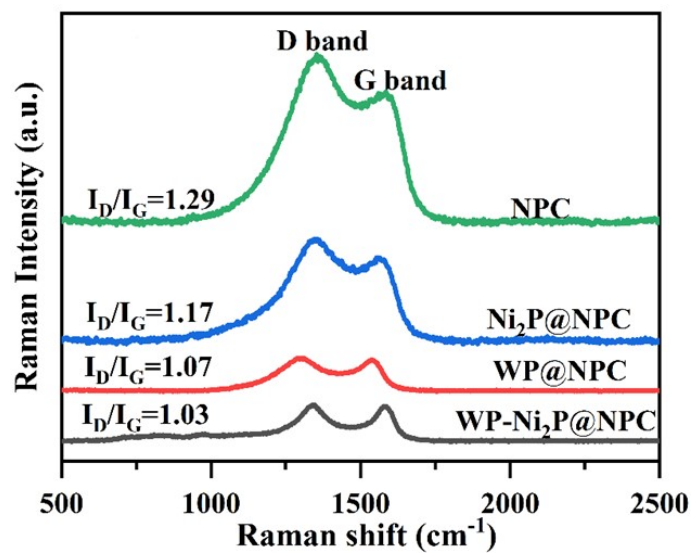

**Figure S1.** Raman spectra of NPC, Ni<sub>2</sub>P@NPC, WP@NPC and WP-Ni<sub>2</sub>P@NPC.

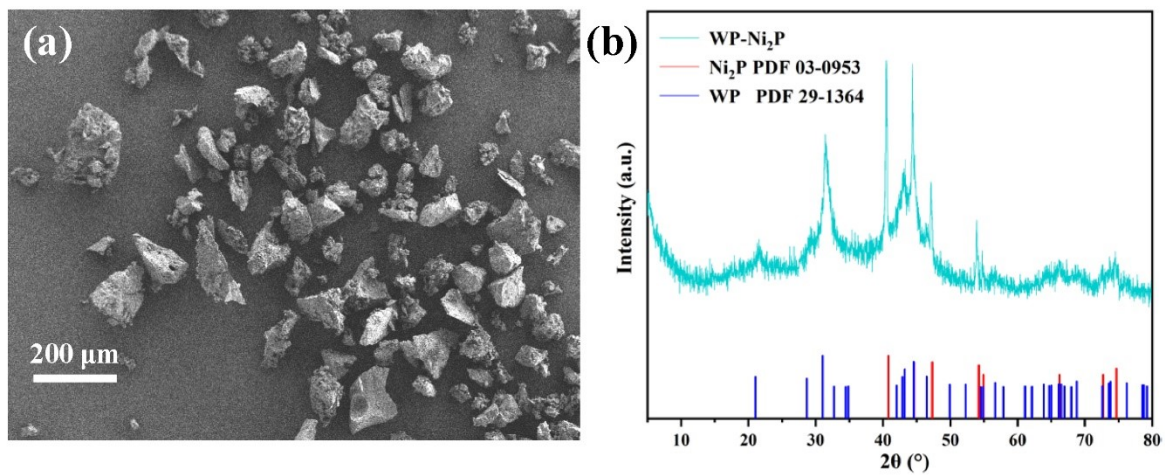

**Figure S2.** (a) SEM image of WP-Ni<sub>2</sub>P. (b) XRD pattern of WP-Ni<sub>2</sub>P.

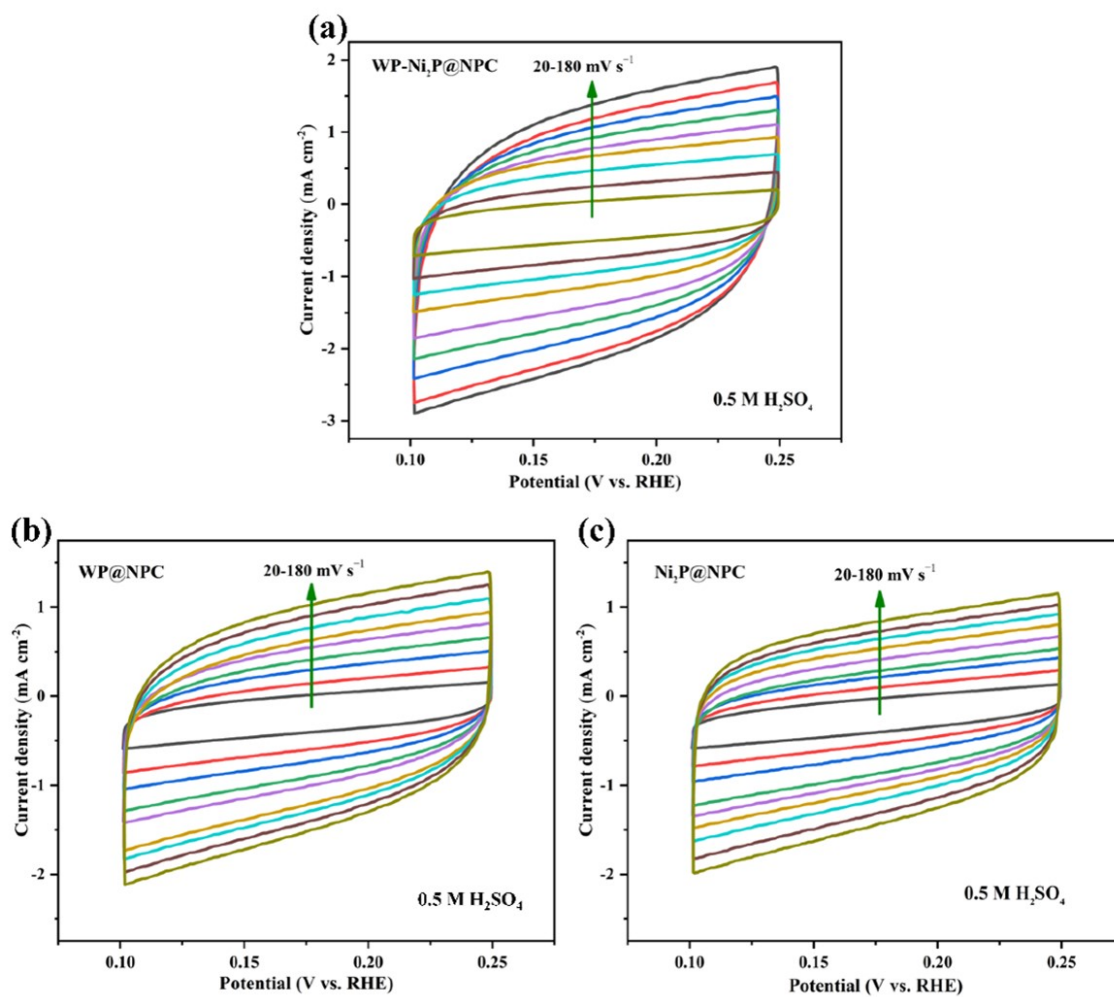

**Figure S3.** (a) CVs of WP-Ni<sub>2</sub>P@NPC, (b) WP@NPC and (c) Ni<sub>2</sub>P@NPC in the potential region of 0.1-0.25 V.

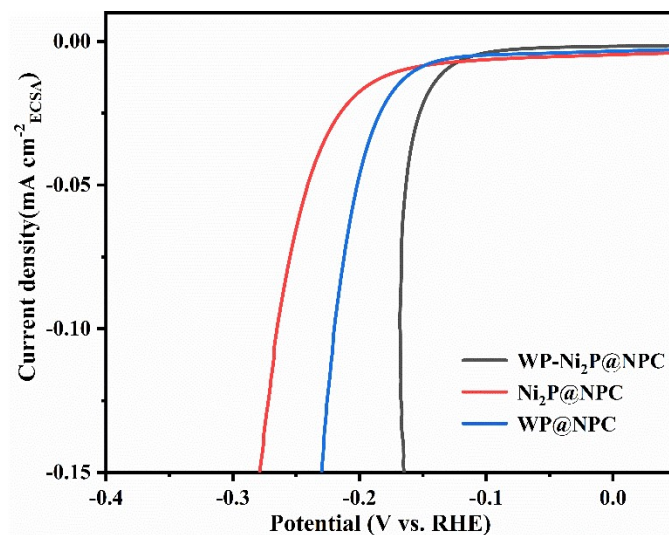

**Figure S4.** The LSV curve of WP-Ni<sub>2</sub>P@NPC, WP-NPC and Ni<sub>2</sub>P@NPC with the current density normalized by ECSA.

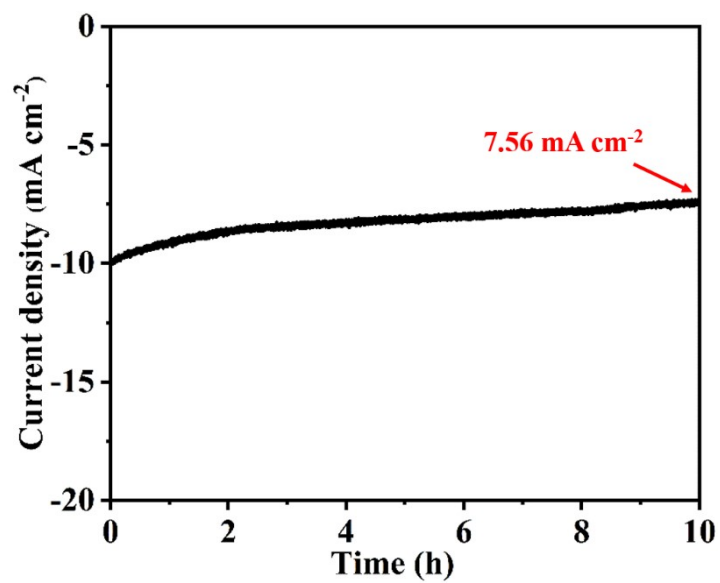

**Figure S5.** The chronoamperometric response of WP-Ni<sub>2</sub>P@NPC towards HER.

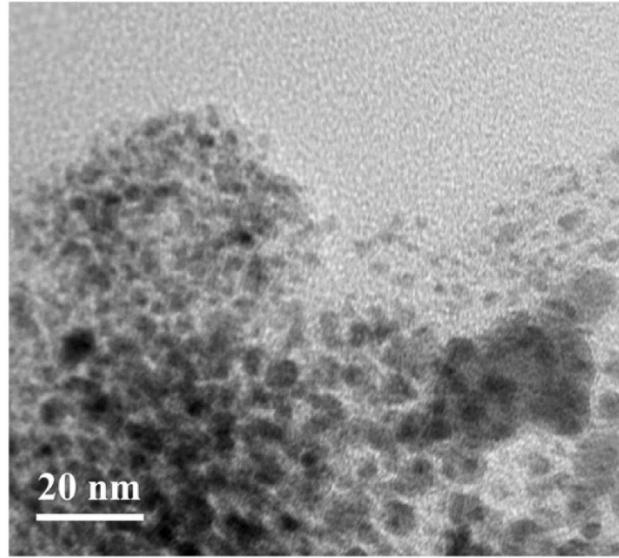

**Figure S6.** TEM image of WP-Ni<sub>2</sub>P@NPC after 3000 repetitive cycles.

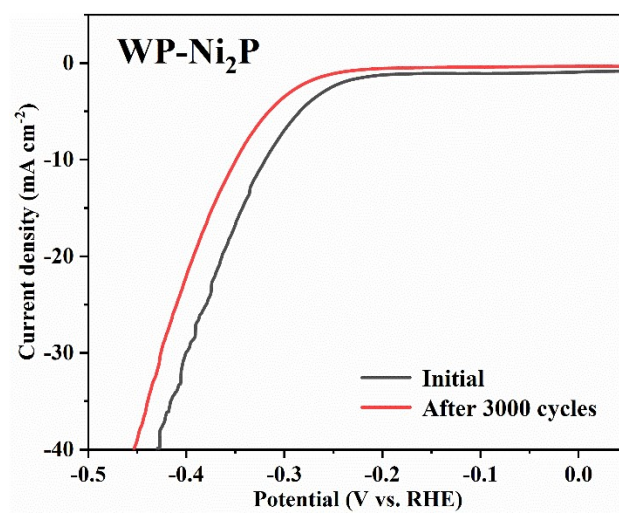

**Figure S7.** LSVs of WP-Ni<sub>2</sub>P before and after 3000 repetitive cycles.



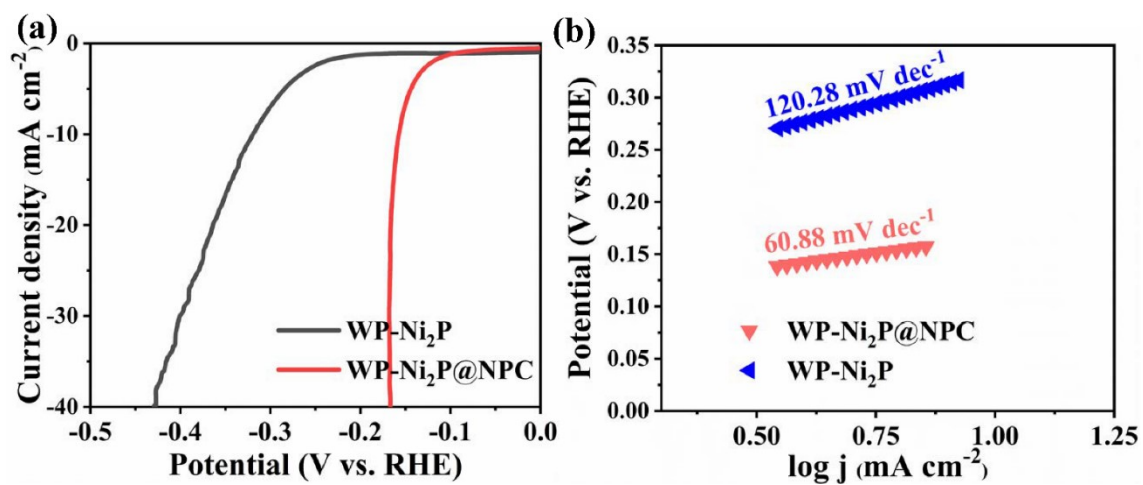

**Figure S8.** (a) LSVs and Tafel slopes of WP-Ni<sub>2</sub>P@NPC and WP-Ni<sub>2</sub>P.

**Table S1** Comparison of the electrocatalytic activity of WP-Ni<sub>2</sub>P@NPC with recently reported phosphide-based electrocatalysts for HER.

| Electrocatalysts                                   | Overpotentials ( $\eta_{10}$ ) | Tafel slopes (mV dec <sup>-1</sup> ) | Electrolytes                             | Ref.             |
|----------------------------------------------------|--------------------------------|--------------------------------------|------------------------------------------|------------------|
| W <sub>2</sub> C/WP@NC                             | 196                            | 77.4                                 | 0.5 M H <sub>2</sub> SO <sub>4</sub>     | [1]              |
| WP <sub>2</sub> /NF                                | 130                            | 94                                   | 1 M KOH                                  | [2]              |
| LC-WP                                              | 170                            | 52                                   | 0.5 M H <sub>2</sub> SO <sub>4</sub>     | [3]              |
| Mo-WP                                              | 175                            | 75                                   | 1 M KOH                                  | [4]              |
| Mo-WP                                              | 139                            | 65                                   | 0.5 M H <sub>2</sub> SO <sub>4</sub>     | [4]              |
| Mo-WP                                              | 216                            | 90                                   | 1 M PBS                                  | [4]              |
| WP                                                 | 314                            | 95.71                                | 0.5 M H <sub>2</sub> SO <sub>4</sub>     | [5]              |
| S-Ni <sub>2</sub> P                                | 290                            | 67.1                                 | 0.5 M H <sub>2</sub> SO <sub>4</sub>     | [6]              |
| S-Ni <sub>2</sub> P                                | 331                            | 104.1                                | 1 M KOH                                  | [6]              |
| Ni <sub>2</sub> P-WO <sub>3</sub>                  | 107                            | 64.2                                 | 1 M KOH                                  | [7]              |
| Co <sub>2</sub> P@Ni <sub>2</sub> P                | 101                            | 79                                   | 1 M KOH                                  | [8]              |
| Ni <sub>12</sub> P <sub>5</sub> -Ni <sub>2</sub> P | 166                            | 60                                   | 0.5 M H <sub>2</sub> SO <sub>4</sub>     | [9]              |
| NiCoP                                              | 130                            | 93                                   | 1 M KOH                                  | [10]             |
| MoP/MoNiP@NC                                       | 137                            | 70                                   | 0.5 M H <sub>2</sub> SO <sub>4</sub>     | [11]             |
| CoP/CNTHPs                                         | 147                            | 78.1                                 | 1 M KOH                                  | [12]             |
| CoNi <sub>x</sub> P-CNF                            | 154                            | 73                                   | 1 M KOH                                  | [13]             |
| CCS-NiFeP-20                                       | 56                             | 38                                   | 1 M KOH                                  | [14]             |
| Ni <sub>2</sub> P-Ru <sub>2</sub> P/NF             | 101                            | 56.7                                 | 1 M KOH                                  | [15]             |
| Co <sub>2</sub> P-C-NPC                            | 151                            | 50.2                                 | 0.5 M H <sub>2</sub> SO <sub>4</sub>     | [16]             |
| Ni-Co <sub>x</sub> P                               | 172                            | 62.3                                 | 0.5 M H <sub>2</sub> SO <sub>4</sub>     | [17]             |
| <b>WP-Ni<sub>2</sub>P@NPC</b>                      | <b>157</b>                     | <b>60.9</b>                          | <b>0.5 M H<sub>2</sub>SO<sub>4</sub></b> | <b>This work</b> |

## References

- 1 P. Wei, X. Sun, M. Wang, J. Xu, Z. He, X. Li, F. Cheng, Y. Xu, Q. Li, J. Han, *ACS. Appl. Mater. Inter.*, 2021, **13**, 53955.
- 2 F. Meng, Y. Yu, D. Sun, L. Li, S. Lin, L. Huang, W. Chu, S. Ma, B. Xu, *Appl. Surf. Sci.*, 2021, **546**, 148926.
- 3 X. Zhang, T. Guo, T. Liu, K. Lv, Z. Wu, D. Wang, *Electrochim. Acta*, 2019, **323**, 134798.
- 4 J. Wang, K. Chang, Z. Sun, J. H. Lee, B. M. Tackett, C. Zhang, J. G. Chen, C.-J. Liu, *Appl. Catal. B- Environ.*, 2019, **251**, 162.
- 5 S. S. Nkabinde, P. V. Mwonga, S. Mpelane, Z. B. Ndala, T. Kolokoto, N. P. Shumbula, O. Nchoe, R. R. Maphanga, K. I. Ozoemena, K. P. Mubiayi, N. Moloto, *New J. Chem.*, 2021, **45**, 15594.
- 6 Y. Wu, X. Chen, L. Su, Q. Wang, S. Ren, *New J. Chem.*, 2022, **46**, 7675.
- 7 B. Wang, L. Wang, Y. Qian, Y. Yang, T. T. Isimjan, X. Yang, *Sustain. Energ. Fuels*, 2021, **5**, 2884.
- 8 H. Jin, S. Liu, L. Pei, G. Li, Z. Ma, W. Bai, S. Wu, Y.-J. Yuan, J. Zhong, *RSC adv.*, 2021, **11**, 22467.
- 9 H. Shi, Q. Yu, G. Liu, X. Hu, *Int. J. Hydrogen Energy*, 2021, **46**, 17097.
- 10 Q. Zhou, D. Wang, *New J. Chem.*, 2022, **46**, 7490.
- 11 J. Li, Y. Liu, X. Li, Q. Pan, D. Sun, L. Men, B. Sun, C. Xu, Z. Su, *Chem. Eng. J.*, 2022, **431**, 133696.
- 12 W. Liao, X. Tong, Y. Zhai, H. Dai, Y. Fu, M. Qian, G. Wu, T. Chen, Q. Yang, *Dalton T.* 2022, **51**, 7561.
- 13 J. Chen, F. Huang, S. Ke, J. Shen, Y. Li, F. Zheng, S. Li, *Dalton T.*, 2022, **51**, 5168.
- 14 S. Li, L. Wang, H. Su, A. N. Hong, Y. Wang, H. Yang, L. Ge, W. Song, J. Liu, T. Ma, X. Bu, P. Feng, *Adv. Funct. Mater.*, 2022, **32**, 2200733.
- 15 S. Yang, J.-Y. Zhu, X.-N. Chen, M.-J. Huang, S.-H. Cai, J.-Y. Han, J.-S. Li, *Appl. Catal. B- Environ.*, 2022, **304**, 120914.
- 16 X. Mu, L. Gong, G. Yang, Y. Xiong, J. Wan, J. Zhu, R. Li, *Int. J. of Energ. Res.*, 2022, **46**, 3502.
- 17 H. Dai, W. Liao, X. Tong, T. Chen, Q. Yang, *Ionics*, 2022, **28**, 2895.
